# Supplementary material for: Enzyme-catalyzed quantitative chain-end functionalization of poly(ethylene glycol)s under solventless conditions
Source: Royal Society of Chemistry journal article supplement (doi:10.1039/c3ra46070c), 2013-11-06
Supplement: c3ra46070c.pdf [file c3ra46070c.pdf]

## Supporting Information

### Enzyme-catalyzed Quantitative Chain-end Functionalization of Poly(ethylene glycol)s under Solventless Conditions

Kwang Su Seo<sup>1</sup>, Marcela Castano<sup>2</sup>, Madalis Casiano<sup>3</sup>, Chrys Wesdemiotis<sup>2,3</sup>, Matthew L. Becker<sup>2</sup>, Judit E. Puskas<sup>1,2,3,\*</sup>

<sup>1</sup>Department of Chemical and Biomolecular Engineering, <sup>2</sup>Department of Polymer Science and <sup>3</sup>Department of Chemistry, The University of Akron, Akron, Ohio 44325

[jpuskas@uakron.edu](mailto:jpuskas@uakron.edu)

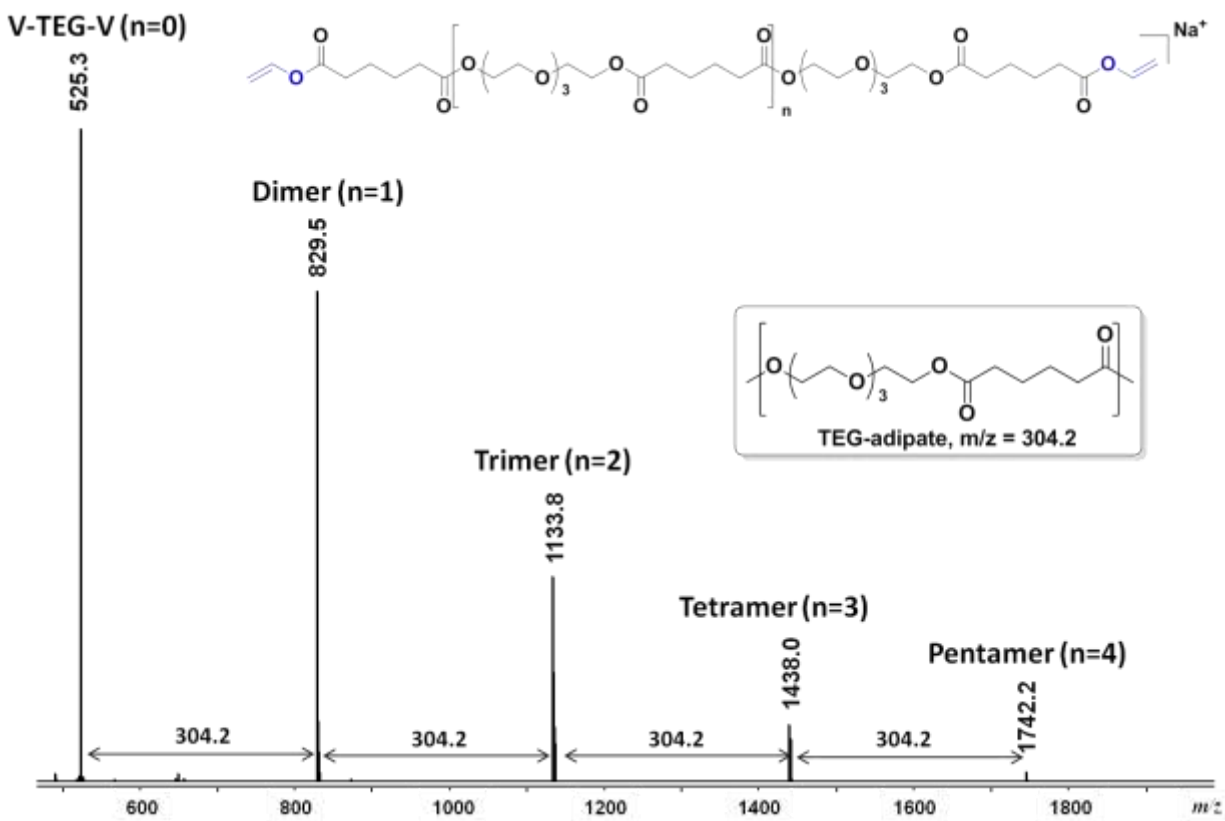

**Figure S1.** MALDI-ToF mass spectrum of the reaction product at DVA/TEG = 6 after 1 hour reaction time (cationizing salt: NaTFA). [DVA] = 4.61 mol/L, [TEG] = 0.77 mol/L, [CALB] =  $7.6 \times 10^{-5}$  mol/L.

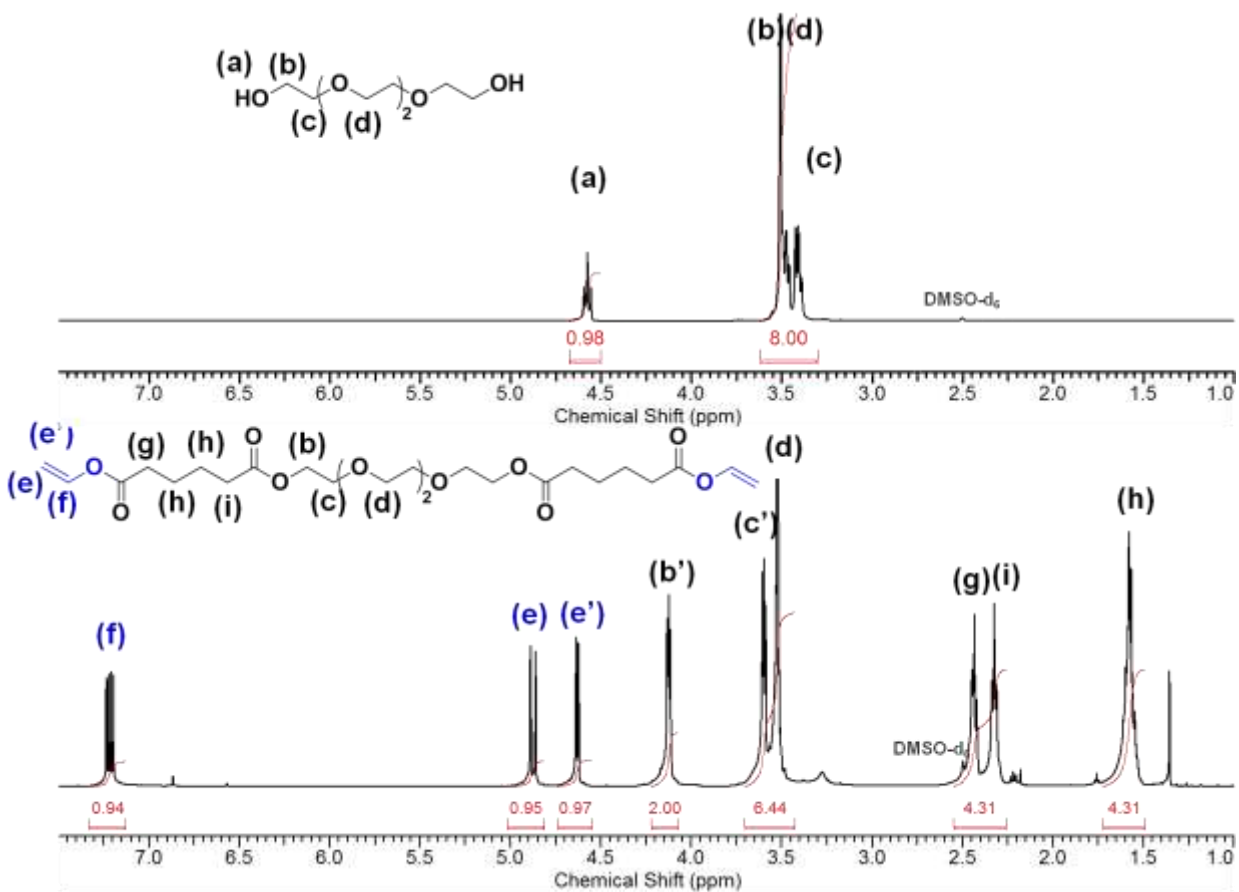

**Figure S2.** <sup>1</sup>H NMR spectra of HO-TEG-OH (top) and V-TEG-V (bottom) (solvent: DMSO-d<sub>6</sub>). [DVA] = 4.61 mol/L, [TEG] = 0.77 mol/L, [CALB] = 7.6 × 10<sup>-5</sup> mol/L.

<sup>1</sup>H NMR: (a) 4.55 ppm; (b) 3.50 ppm; (b') 4.22 ppm; (c) 3.46 ppm; (c') 3.60 ppm; (d) 3.50 ppm; (e) 4.87 ppm; (e') 4.65 ppm; (f) 7.24 ppm; (g) 2.45 ppm; (h) 1.62 ppm; (i) 2.32 ppm.

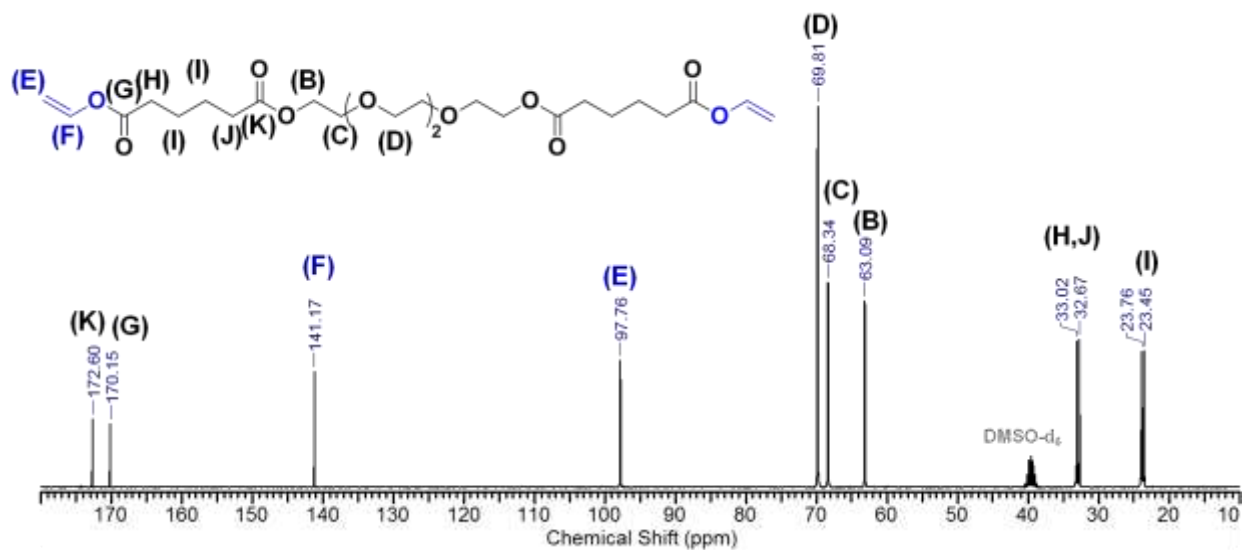

**Figure S3.**  $^{13}\text{C}$  NMR spectrum of telechelic vinyl-functionalized TEG (solvent: DMSO- $d_6$ ).

$^{13}\text{C}$  NMR: (B) 63.09 ppm; (C) 68.34 ppm; (D) 69.81 ppm; (E) 97.76 ppm; (F) 141.17 ppm; (G) 170.15 ppm; (H) 33.02 ppm; (I) 23.76/23.45 ppm; (J) 32.67 ppm; (K) 172.60 ppm.

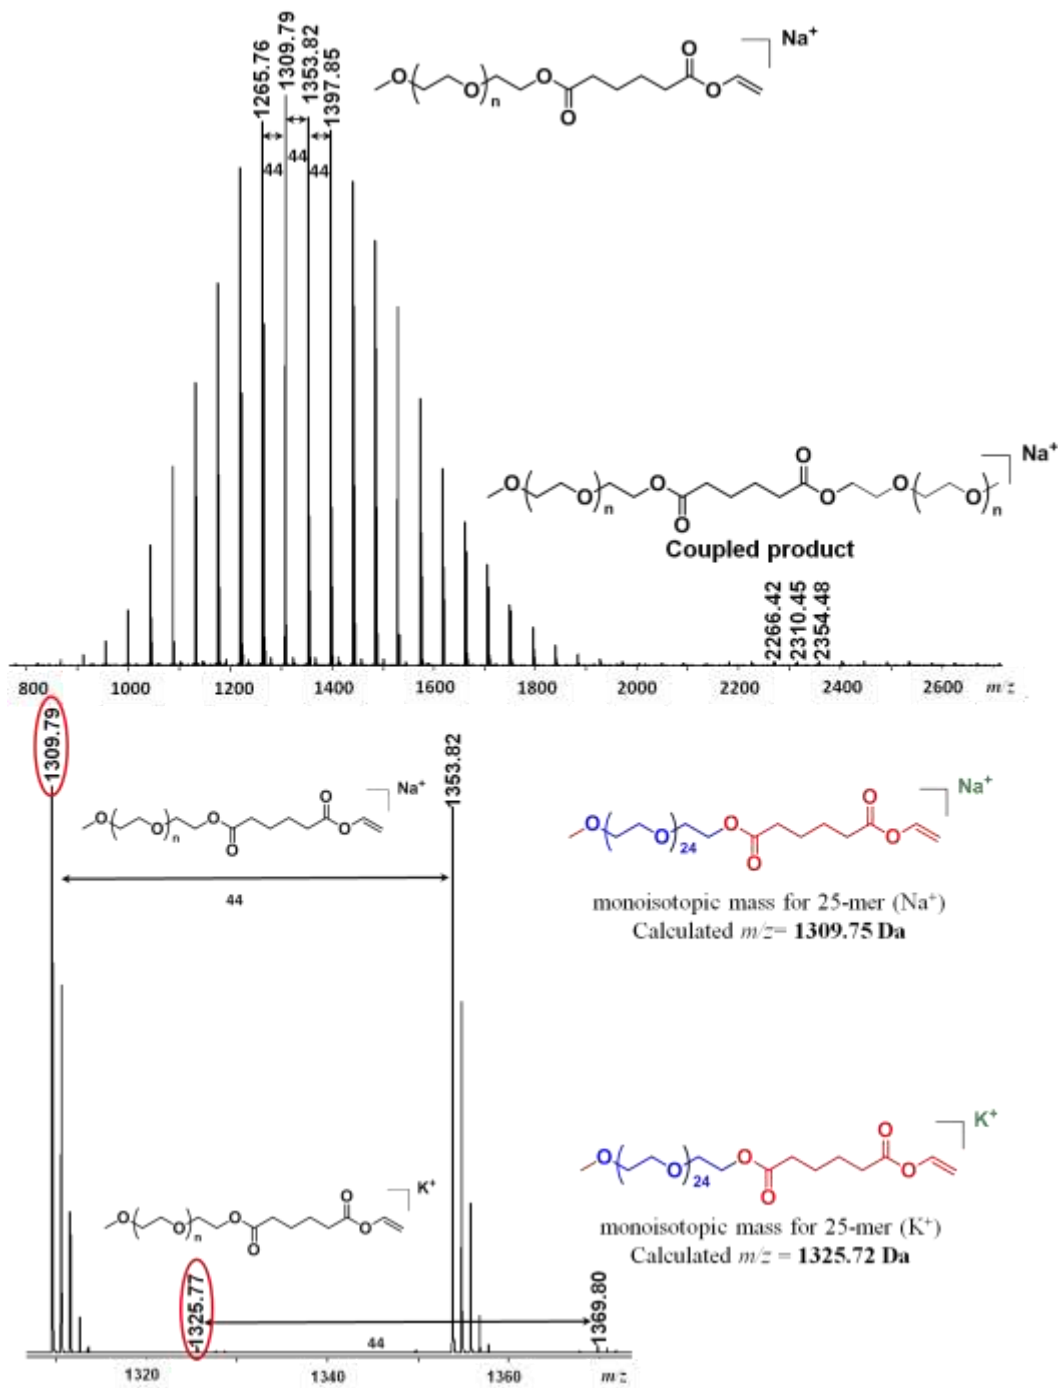

**Figure S4.** MALDI-ToF mass spectrum of the product at  $\text{DVA}/\text{MeO-PEG-OH}_{1100} = 5$ .  $[\text{DVA}] = 5.30 \text{ mol/L}$ ,  $[\text{MeO-PEG-OH}_{1100}] = 1.06 \text{ mol/L}$ ;  $[\text{CALB}] = 6.9 \times 10^{-4} \text{ mol/L}$ .

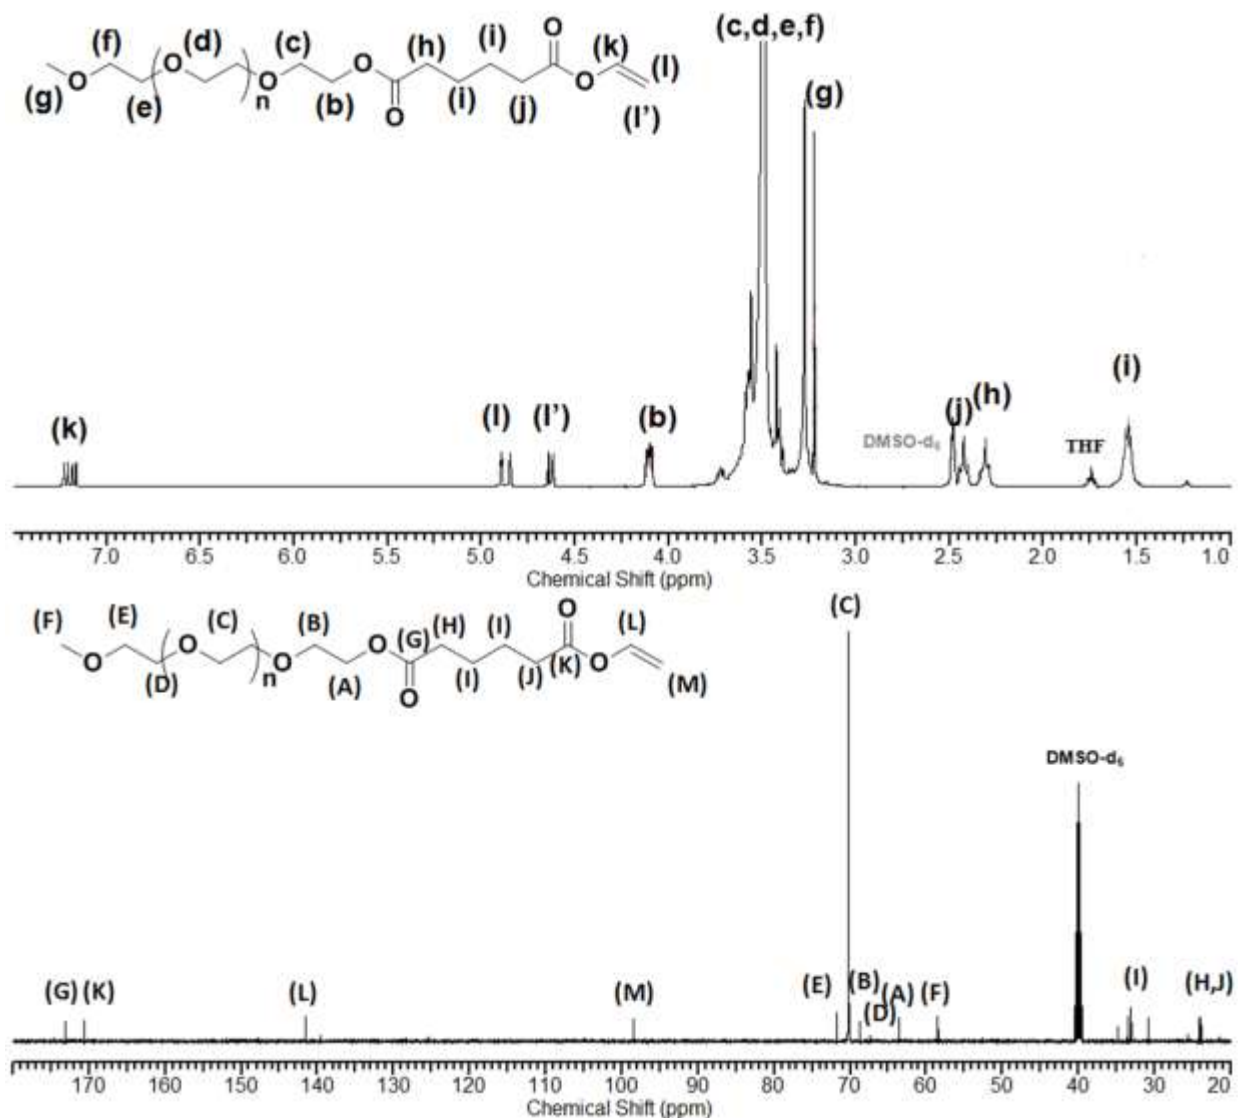

**Figure S5.** NMR spectra of the product of the reaction of DVA (5.0 eq.) with MeO-PEG-OH<sub>1100</sub>: (top) <sup>1</sup>H NMR spectrum and (bottom) <sup>13</sup>C NMR spectrum (solvent: DMSO-d<sub>6</sub>). [DVA] = 5.30 mol/L, [MeO-PEG-OH<sub>1100</sub>] = 1.06 mol/L; [CALB] = 6.9 × 10<sup>-4</sup> mol/L.

<sup>1</sup>H NMR: (b) 4.14 ppm; (c) 3.60 ppm; (d) 3.50 ppm; (e) 3.45 ppm; (f) 3.37 ppm; (g) 3.22 ppm; (h) 2.32 ppm; (i) 1.56 ppm; (j) 2.44 ppm; (k) 7.18 ppm (l) 4.64 ppm, (l') 4.85 ppm.

<sup>13</sup>C NMR: (A) 63.12 ppm; (B) 68.04 ppm; (C) 70.01 ppm; (D) 67.00 ppm; (E) 71.79 ppm; (F) 57.98 ppm; (G) 73.11 ppm; (H) 23.86 ppm; (I) 33.00 ppm; (J) 23.83 ppm; (K) 170.06 ppm; (L) 141.51 ppm (M) 98.08 ppm.
